# Supplementary material for: From pollen grains to functionalized microcapsules: a facile chemical route using ionic liquids
Source: Royal Society of Chemistry journal article supplement (doi:10.1039/c6gc02892f), 2016-12-12
Supplement: c6gc02892f1.pdf [file c6gc02892f1.pdf]

### Electronic Supplementary Information

Cinzia Chiappe,<sup>a</sup> Gian Carlo Demontis,<sup>a</sup> Valeria Di Bussolo,<sup>b</sup> Maria Jesus Rodriguez Douton,<sup>a</sup> Francesco Rossella,<sup>c</sup> Christian Silvio Pomelli,<sup>a</sup> Stefania Sartini<sup>a</sup> and Stefano Caporali<sup>d</sup>

<sup>a</sup> Dipartimento di Farmacia, Università di Pisa, Via Bonnano 33, 56126 Pisa, Italy.

<sup>b</sup> Dipartimento di Chimica e Chimica Industriale, Università di Pisa, Via Moruzzi 13, 56125 Pisa, Italy.

<sup>c</sup> NEST, Scuola Normale Superiore & Istituto NanoScienze-CNR, Pisa, Italy.

<sup>d</sup> Consorzio Interuniversitario Nazionale per la Scienza e Tecnologia dei Materiali (INSTM), 50123 Firenze, Italy and CNR-Istituto Sistemi Complessi (ISC), 50019 Sesto Fiorentino, Italy.

| Pollen         | % C     | % H    | % N     | % S    |
|----------------|---------|--------|---------|--------|
| No treatment   | 44.1743 | 5.8116 | 7.5825  | 0.4867 |
| IL (3)-treated | 54.1712 | 7.3353 | 10.0277 | 0.4252 |
| IL (4)-treated | 52.0962 | 7.3666 | 10.4272 | 0.2863 |
| IL (5)-treated | 52.3828 | 7.4425 | 10.3383 | 0.3017 |
| IL (6)-treated | 64.4981 | 6.4480 | 2.2447  | 2.8328 |
| IL (7)-treated | 54.1013 | 7.3910 | 8.7302  | 1.5800 |

Table S.1. Elemental composition of pristine and IL-treated pollen grains (*Populus deltoides*).

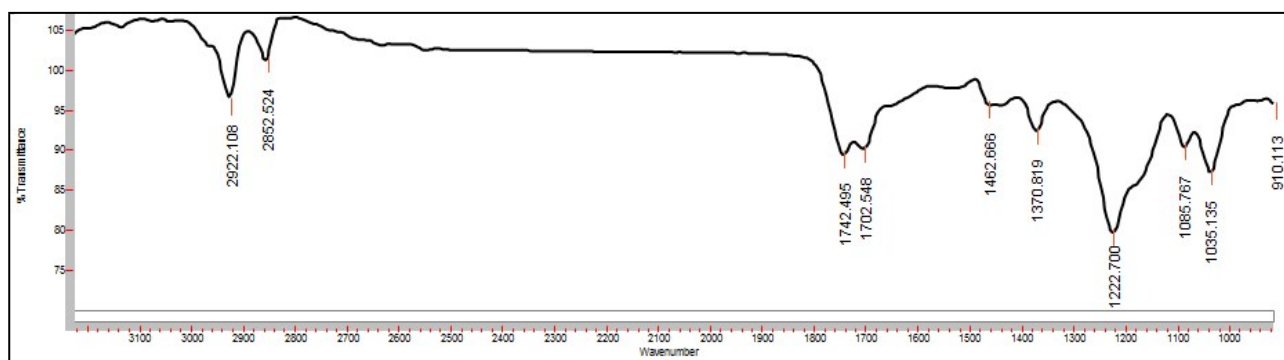

Fig. S.1. FTIR spectra of Ac<sub>2</sub>O/H<sub>2</sub>SO<sub>4</sub>-treated pollen.

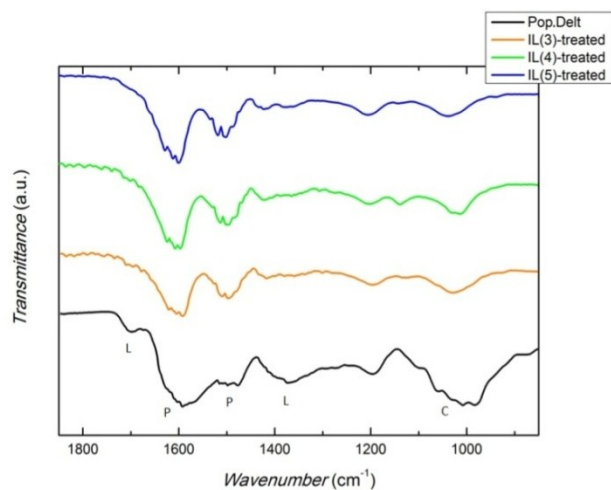

Fig. S.2. FTIR spectra of the pristine pollen *Populus deltoides* and the pollen grains after treatment with alkyl-phosphate or alkyl-phosphonate based ILs: IL(3): [DMIM][(MeO)(H)PO<sub>2</sub>]; IL(4): [DMIM][(MeO)(Me)PO<sub>2</sub>]; IL(5): [DMIM][(MeO)<sub>2</sub>PO<sub>2</sub>].

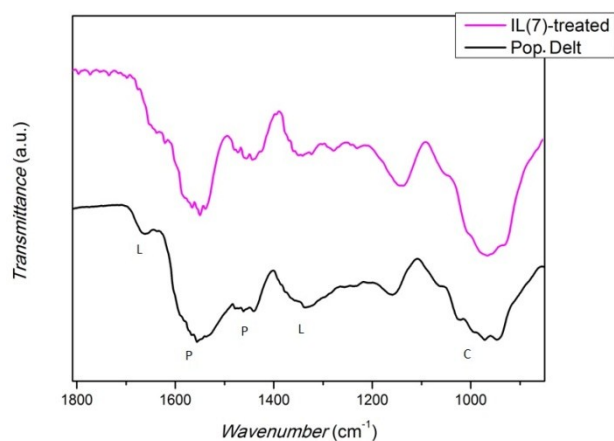

Fig. S.3. FTIR spectra of the pristine *Populus deltoides* and IL(7)-treated [DBUH][HSO<sub>4</sub>] pollen grains.
